# Supplementary material for: Estimating the size of a methane emission point source at different scales: from local to landscape
Source: Copernicus journal article supplement (doi:10.5194/acp-17-7839-2017), 2017-06-29
Supplement: Supplementary file 1 [file acp-17-7839-2017-supplement.pdf]

Supplement of Atmos. Chem. Phys., 17, 7839–7851, 2017  
<https://doi.org/10.5194/acp-17-7839-2017-supplement>  
© Author(s) 2017. This work is distributed under  
the Creative Commons Attribution 3.0 License.

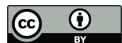

*Supplement of*

## **Estimating the size of a methane emission point source at different scales: from local to landscape**

**Stuart N. Riddick et al.**

*Correspondence to:* Stuart N. Riddick (sriddick@princeton.edu) and Neil R. P. Harris (neil.harris@cranfield.ac.uk)

The copyright of individual parts of the supplement might differ from the CC BY 3.0 License.

## Supplementary Material Section 1

The standard deviation of the lateral ( $\sigma_y$ , m) and vertical ( $\sigma_z$ , m) mixing ratio distribution calculated from the stability class of the air (Pasquill, 1974).

| Stability Class | Day                             |        |     | Night |          |       |
|-----------------|---------------------------------|--------|-----|-------|----------|-------|
|                 | Wind Speed (m s <sup>-1</sup> ) | Strong | Mod | Light | Overcast | Clear |
| 2               |                                 | a      | a   | b     |          |       |
| 3               |                                 | b      | b   | c     | e        | f     |
| 4               |                                 | b      | c   | c     | d        | e     |
| 5               |                                 | c      | c   | d     | d        | d     |
| 6               |                                 | c      | d   | d     | d        | d     |

| sigz            |           |        |
|-----------------|-----------|--------|
| Stability Class | a         | b      |
| A               | 0.0002539 | 2.089  |
| B               | 0.04936   | 1.114  |
| C               | 0.1154    | 0.9109 |
| DD              | 0.7368    | 0.5642 |
| DN              | 1.297     | 0.4421 |
| E               | 0.9204    | 0.4805 |
| F               | 1.505     | 0.3662 |

| sigy            |        |       |
|-----------------|--------|-------|
| Stability Class | c      | d     |
| A               | 0.495  | 0.873 |
| B               | 0.31   | 0.897 |
| C               | 0.197  | 0.908 |
| DD              | 0.122  | 0.916 |
| DN              | 0.122  | 0.916 |
| E               | 0.0934 | 0.912 |
| F               | 0.0625 | 0.911 |

## Supplementary Material Section 2

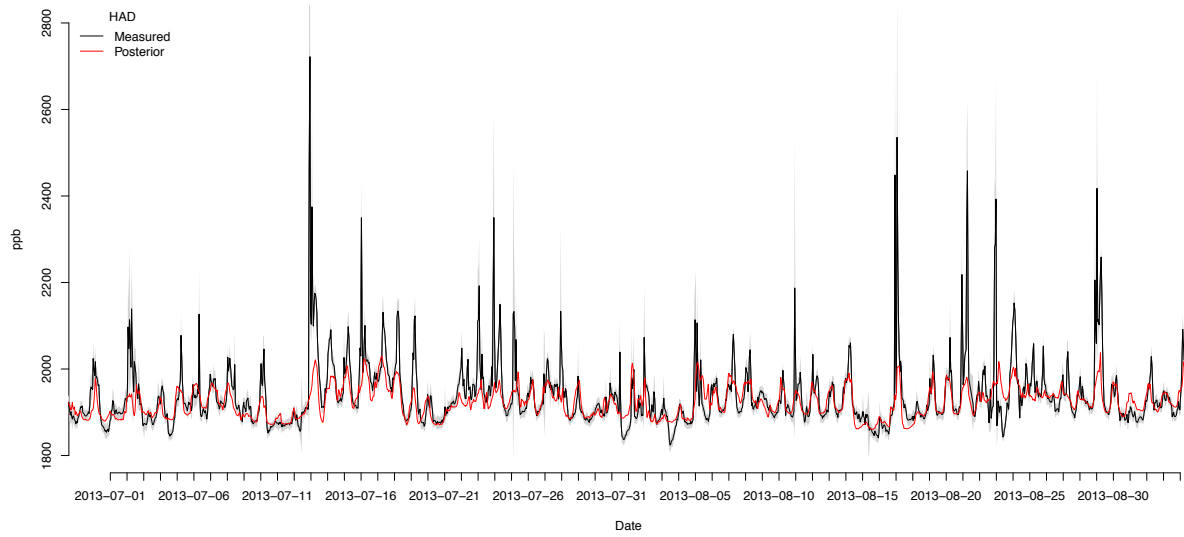

**Figure SM2.1** An example of the time-series of observations, background values and posterior enhancement as calculated by the InTEM model from July 2013 to August 2013 for the measurement site in Haddenham, Cambridgeshire.

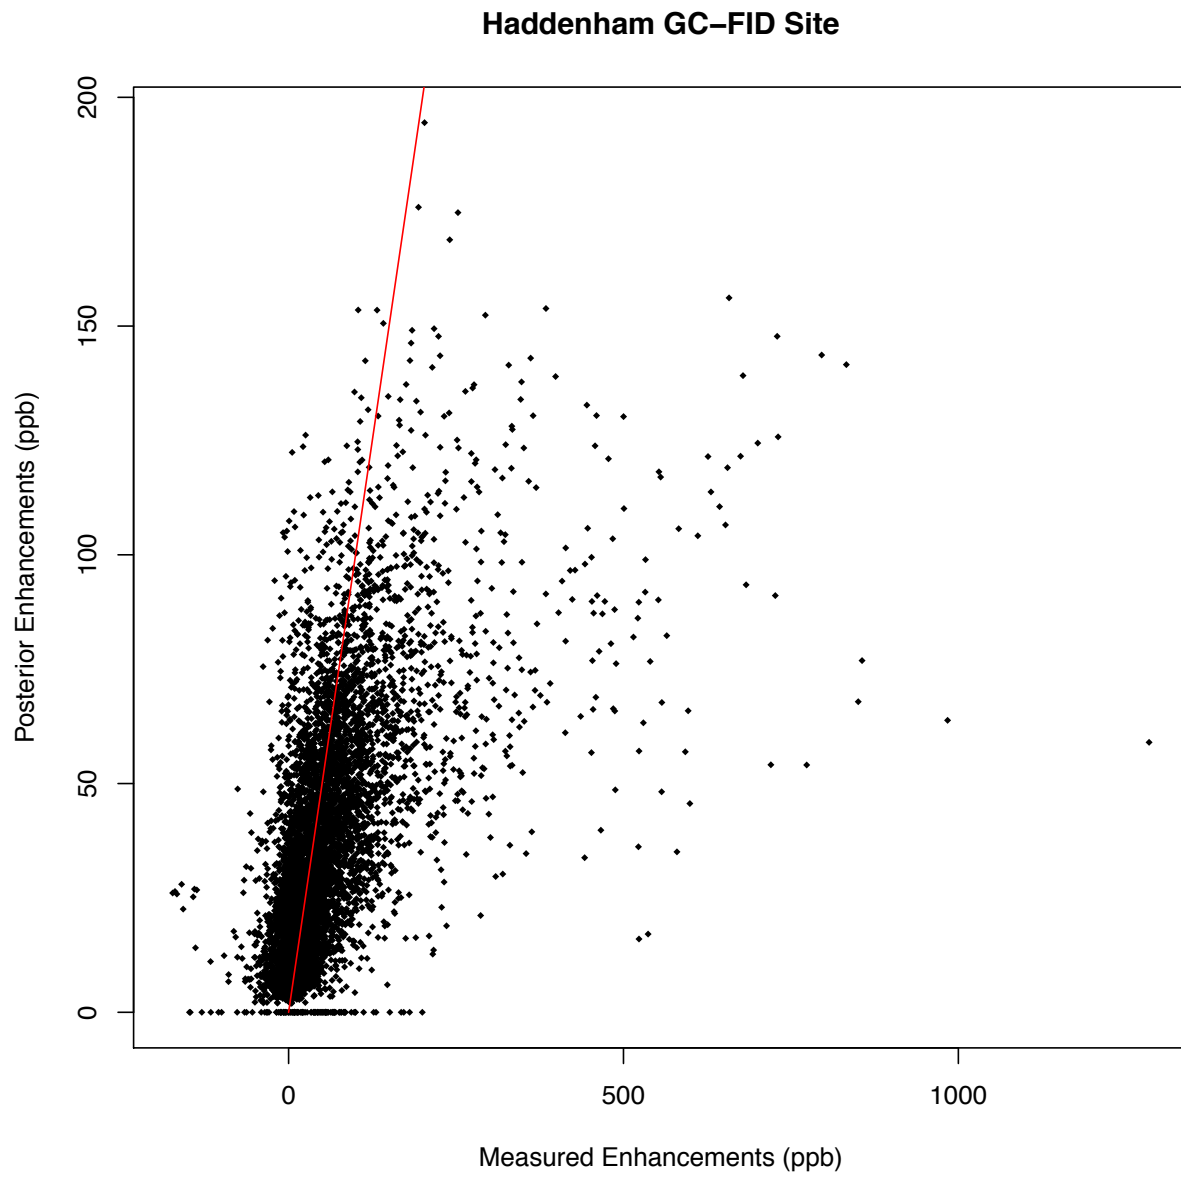

**Figure SM2.2** Scatterplot of posterior enhancements vs. observed enhancements as calculated by the InTEM model for the Haddenham, Cambridgeshire.

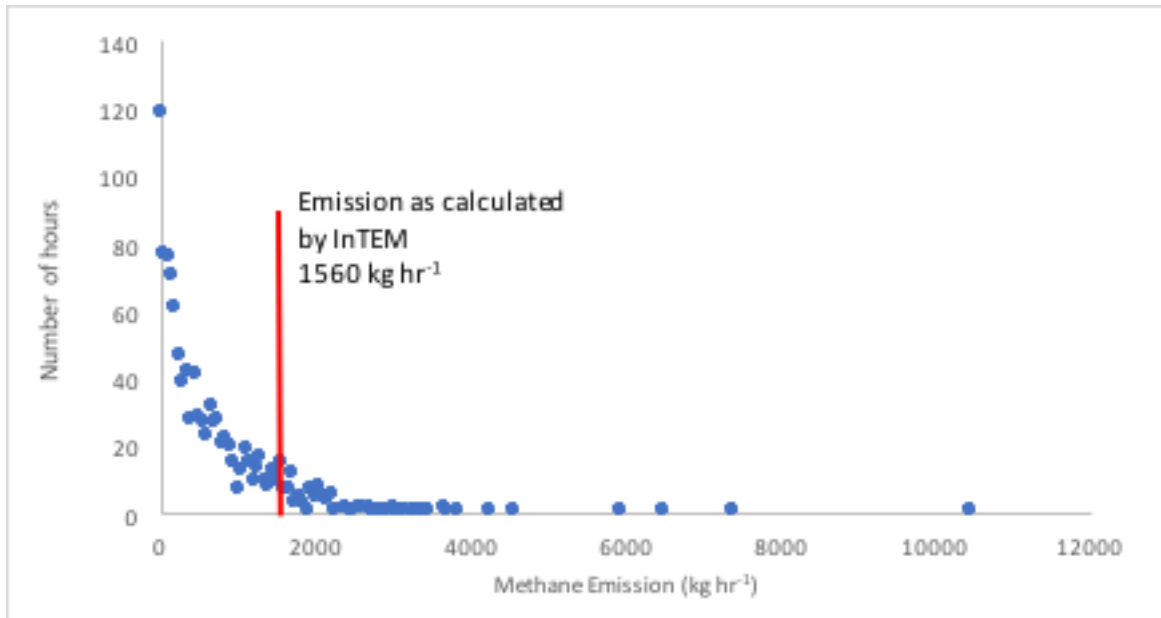

Figure SM2.3 Distribution of hourly methane emissions from the landfill as calculated using the Gaussian Plume model using methane concentration data collected at Haddenham church. The data includes emission estimates from July 2012 to July 2014. The red line represents the emission from the landfill as calculated by the InTEM model.
